# Supplementary material for: Electrochemical device based on a Pt nanosphere-paper working electrode for in situ and real-time determination of the flux of H2O2releasing from SK-BR-3 cancer cells
Source: Royal Society of Chemistry journal article supplement (doi:10.1039/c4cc04199b), 2014-07-14
Supplement: c4cc04199b1.pdf [file c4cc04199b1.pdf]

## 1 **Electronic Supplementary Information**

### 2 **Pt nanospheres grown paper working electrode based electrochemical device for** 3 **in-situ and real-time determination of the flux of H<sub>2</sub>O<sub>2</sub> releasing from SK-BR-3** 4 **cancer cells**

5 Fang Liu<sup>a</sup>, Shenguang Ge<sup>b</sup>, Jinghua Yu<sup>a,\*</sup>, Mei Yan, Xianrang Song<sup>c</sup>

6

## 7 **Materials and methods**

### 8 **Reagents**

9 All chemicals and solvents used here were aseptic after heat sterilization  
10 treatment. Chloroplatinic acid (H<sub>2</sub>PtCl<sub>6</sub>) was obtained from Shanghai Chemical  
11 Reagent Company (Shanghai, China). Catalase (from bovine liver, lyophilized  
12 powder, 2000-5000 U/ mg, Sigma), phorbol myristate acetate (PMA, ~99%, Sigma),  
13 N-formylmethionyl-leucylphenylalanine (fMLP, ≥97%, Sigma), adenosine 5'-  
14 diphosphate (ADP, ≥95%, Sigma), ascorbic acid (AA, ≥99.0%, Sigma), Solutions  
15 of H<sub>2</sub>O<sub>2</sub> were freshly diluted from the 30% solution, and their concentrations were  
16 determined using a standard KMnO<sub>4</sub> solution. The S6 aptamer with high specificity  
17 for SK-BR-3 cells was synthesized and purified by Shanghai Sangon Biotechnology  
18 Co. Ltd. (Shanghai, China).

19 The human breast cancer cells SK-BR-3 were provided by Shandong Tumor  
20 Hospital. The sequence of S6 aptamer was 5'-NH<sub>2</sub>-TGGATGGGGAGAT  
21 CCGTTGAGTAAGCGGGCGTGTCTCTCTGCCGCCTTGCTATGGGG-3'. Calcein

22 acetoxymethyl ester (AM) and fluorescein isothiocyanate labeled annexin-V (FITC-  
23 annexin-V) were purchased from Beijing Biosynthesis Biotechnology Co. Ltd.  
24 (Beijing, China).

25 0.1 M phosphate buffer solution (PBS, pH 7.4) was employed as the supporting  
26 electrolyte. Carbon ink (ED423ss) and Ag/AgCl ink (CNC-01) were  
27 purchased from Acheson. Whatman chromatography paper #1 (58.0 cm × 68.0 cm)  
28 (pure cellulose paper) was obtained from GE Healthcare Worldwide  
29 (Pudong, Shanghai, China) and used with further adjustment of size (A4 size).

### 30 **Apparatus**

31 Scanning electron microscope (SEM) analyses were performed using QUANTA  
32 FEG 250 thermal field emission scanning electron microscopy (FEI Co., USA).  
33 Electrochemical impedance spectra (EIS) were performed on a CHI 604D  
34 electrochemical workstation (Shanghai CH Instruments Inc., China). Electrochemical  
35 measurements were carried out with a homemade EC system. The current was  
36 measured on a CHI 660D electrochemical workstation (Shanghai Chenhua Apparatus  
37 Corporation, China) with a three-electrode system, whereas the modified PWE with a  
38 diameter of 6.0 mm was used as the working electrode, screen-printed carbon  
39 electrode and Ag/AgCl electrode were used as the counter electrode and the reference  
40 electrode, respectively.

### 41 **Preparation of Pt nanoparticles**

42 Pt nanoparticles were prepared according to a facile method described as follows.  
43  $\text{H}_2\text{PtCl}_6$  and trisodium citrate solutions were filtered through a 0.22- $\mu\text{m}$  microporous

44 membrane filter prior to use, and then 3.0 mL of 1% trisodium citrate was added to 20  
45 mL of boiling 0.05% H<sub>2</sub>PtCl<sub>6</sub> solution and stirred for 30 min at the boiling point. The  
46 final Pt nanoparticles prepared by this method have an average diameter of ~5 nm.

#### 47 **Fabrication of Pt-PWE**

48 Prior to the S6 aptamer immobilization, growth of Pt layer on the surfaces of  
49 cellulose fibers in the paper working zone of PWE was implemented to fabricate a  
50 novel Pt-PWE with enlarged effective surface area and enhanced electrocatalytic  
51 reduction property for sensitive H<sub>2</sub>O<sub>2</sub> sensing. This novel Pt-PWE was fabricated on  
52 this 3D origami electrochemical device through a direct chemical reduction of  
53 H<sub>2</sub>PtCl<sub>6</sub> by AA. First, as-prepared Pt nanoparticle seeds solution (15.0 μL) was  
54 dropped into the bare PWE. Then the origami device was equilibrated at room  
55 temperature for 1 h to optimize the surface immobilization of Pt nanoparticle seeds on  
56 cellulose fibers. After rinsing with water thoroughly to remove loosely bound Pt  
57 nanoparticle seeds, freshly prepared silver-growth solution (15.0 μL) containing  
58 0.50 mM H<sub>2</sub>PtCl<sub>6</sub> and 0.25 mM AA was applied into the Pt nanoparticles seeded  
59 PWE, respectively, and incubated at room temperature for 4 min. During the growth  
60 process, the Pt nanoparticle seeds acted as catalysts for the reduction of H<sub>2</sub>PtCl<sub>6</sub> by  
61 AA, resulting in the enhancement of the Pt nanoparticle seeds. Subsequently, the  
62 resulting Pt-PWEs were washed with water thoroughly. Thus a layer of  
63 interconnected Pt nanoparticle on cellulose fibers with good conductivity was  
64 obtained (Scheme 1B), which was dried at room temperature for 20 min.

#### 65 **Cell culture**

66 The SK-BR-3 human breast cancer cells were obtained from Shandong Tumor  
67 Hospital. Breast cancer cells were maintained in dulbecco's modified eagle medium  
68 (DMEM) supplemented with 10% fetal bovine serum and 1% penicillin/streptomycin.  
69 Cultures were maintained at 37 °C and in 5% CO<sub>2</sub> atmosphere. The culture medium  
70 was changed every other day and the cells were passaged when they reached 80-90%  
71 confluency. For cancer cell electrochemical measurement, cells were placed inside a  
72 12-well plate. When cultured for two days, cancer cells were digested by pancreatic  
73 enzymes and dispersed in PBS. After being blown well, cancer cells were counted by  
74 a Petroff- Hausser cell counter (U.S.A.).

#### 75 **Fabrication and characterization of this 3D origami EC device**

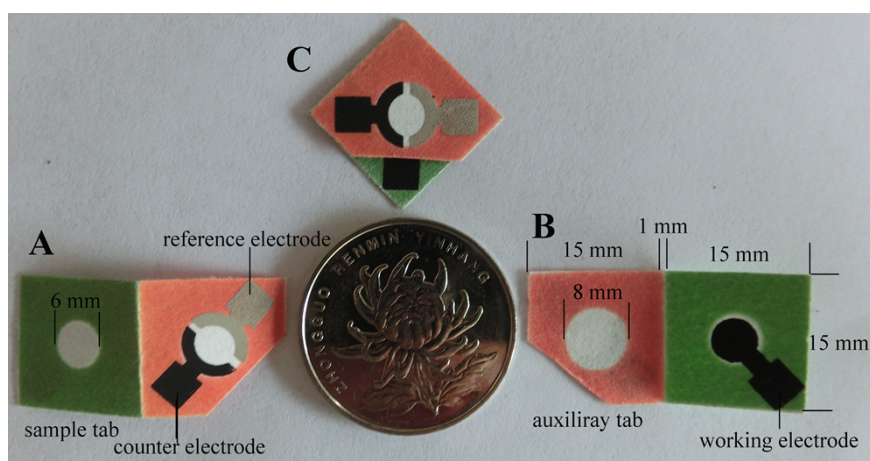

77 Scheme S1. (A) The schematic representation, size, and shape of this  $\mu$ -PAD. (B) One side of the  
78  $\mu$ -PAD with the screen-printed reference and counter electrode; (C) The reverse side of (B) with  
79 the screen-printed working electrode.

80

81 The preparation of this  $\mu$ -PAD was similarly to our previous work [1] with large  
82 modifications and a detailed procedure was described below. This origami device was

83 comprised of a square sample tab (Scheme S1A, 15.0 mm × 15.0 mm) and a square  
84 auxiliary tab (Scheme S1B, 15.0 mm × 15.0 mm). An angle of the square auxiliary tab  
85 was cut off for exposure of the contact pad of screen-printed carbon working  
86 electrode (Scheme S1B). The entire origami device could be produced in bulk on an  
87 A4 paper sheet by a commercially available solid-wax printer (Xerox Phaser 8560N  
88 color printer). Owing to the porous structure of paper, the melted wax can penetrate  
89 into the paper network to decrease the hydrophilicity of paper remarkably while the  
90 unprinted area (paper auxiliary zone and paper sample zone) still maintained good  
91 hydrophilicity, flexibility, and porous structure and will not affect the further screen-  
92 printing of electrodes and modifications [2].

93       Between the sample tab and auxiliary tab, the unprinted line (1 mm in width)  
94 was defined as fold line (Scheme S1B). The unprinted hydrophilic area (paper  
95 auxiliary zone and paper sample zone) constituted the reservoir of the paper  
96 electrochemical cell (~40 μL) after being folded at the predefined fold line. Then, the  
97 wax-penetrated paper sheet was ready for screen-printing of electrode containing the  
98 wire and contact pad on its corresponding paper zone (Scheme S1B, C). The electrode  
99 array consisted of a screen-printed Ag/AgCl reference electrode and carbon counter  
100 electrode on the auxiliary zone (Scheme S1A) and screen-printed carbon working  
101 electrode (6 mm in diameter) on the reverse side of paper sample zone (Scheme S1B),  
102 respectively. After folding (Scheme S1C), the three screen-printed electrodes will be  
103 connected once the paper electrochemical cell was filled with solution.

104 **Electrical resistivity of Pt nanospheres grown paper sample zone**

105 To measure the resistivity of Pt nanospheres grown paper sample zone exactly,  
106 rectangular paper zones (1.0 mm×20.0 mm) were fabricated by wax-printing and  
107 then were modified through the growth of dense Pt nanospheres conducting layer on  
108 the surfaces of cellulose fibers in these rectangular paper zones using the same  
109 method described in experimental section under the same experimental conditions in  
110 each case, the average electrical resistivity of which revealed the electrical resistivity  
111 of Pt nanospheres grown paper sample zone in this work. Prior to the measurements,  
112 both the bare and Pt nanospheres grown rectangular paper zones were dried in a  
113 drying oven for 3 h. Then the measurements were performed with a four-point  
114 measurement setup using a digital multi-meter (Agilent, U1251B).

#### 115 **Detection of H<sub>2</sub>O<sub>2</sub> standard solution at our cancer cell immobilized Pt-PWE**

116 Our work aimed at developing a biosensor for monitoring the release process and  
117 measuring the flux of H<sub>2</sub>O<sub>2</sub> from cells. To evaluate the possibility of the biosensor  
118 used in this purpose, the current responses of our modified Pt-PWEs toward the  
119 various concentrations of H<sub>2</sub>O<sub>2</sub> were studied. And the potential swept from 0 to -0.6  
120 V with scan rate of 100 mV s<sup>-1</sup> after 10 μL of PBS buffer solution (pH 7.4) was added.  
121 PBS buffer containing different concentrations of H<sub>2</sub>O<sub>2</sub> standard solution (early  
122 determined using a standard KMnO<sub>4</sub> solution) were used in this experiment as  
123 detection solution. At the absence of H<sub>2</sub>O<sub>2</sub>, the current response of the modified  
124 porous Pt-PWE is weak. Upon addition of H<sub>2</sub>O<sub>2</sub> with increasing concentrations, the  
125 intensity of the cathodic current of the modified porous Pt-PWE increases gradually.

#### 126 **Characterizations of Pt-PWE**

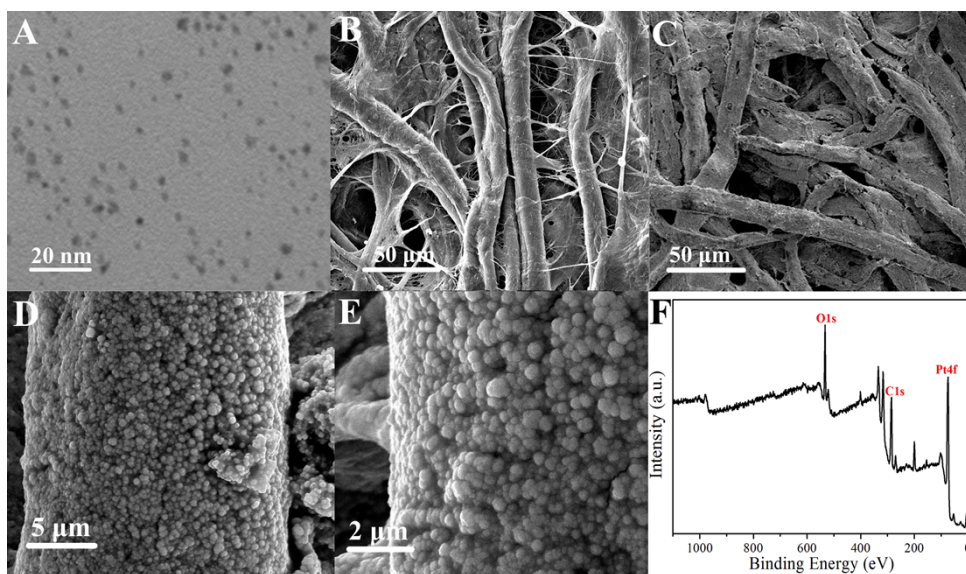

127 Fig. S1 TEM image of Fig. S1 TEM image of the as-prepared Pt nanoparticle seeds (A); SEM  
 128 images of bare paper sample zone of PWE (B); Growth of Pt nanospheres layer on the surfaces  
 129 of cellulose fibers in paper sample zone of PWE under different magnification: (C, D, E); XPS of  
 130 Pt nanospheres modified paper sample zone (F).

131

132 The PWE was modified through the growth of a Pt nanospheres layer on the  
 133 surfaces of cellulose fibers in paper sample zone from Pt nanoparticle seeds to  
 134 fabricate this novel Pt-PWE. Fig. 1SA showed the TEM image of the as-prepared Pt  
 135 nanoparticle seeds with the average diameter of about 5 nm. As shown in Fig. 1SB,  
 136 the porous bare paper sample possessed high ratio of surface area to weight with  
 137 rough cellulose fibers, which could offer an excellent adsorption microenvironment  
 138 for the Pt nanoparticles. After Pt nanoparticles were successfully seeded and grown  
 139 on the cellulose fiber, a continuous and dense Pt nanospheres conducting layer on the  
 140 cellulose fiber surfaces was observed (Fig. 1SC, D ). The enlarged image of Pt  
 141 nanospheres grown cellulose fiber was shown in Fig. 1SE, showing the uniform

142 growth of Pt nanospheres. This indicated that a good coverage of Pt nanospheres on  
143 the surfaces of the cellulose fibers was obtained using our simple growth method. The  
144 Pt nanospheres grown paper sample zone maintained good 3D interwoven and  
145 incompact cellulose fibers networks structure after the growth process, which would  
146 facilitate the area-to-volume ratio as well as increase the catalytic active sites to  
147 obtain better electrochemical performance. In addition, the successful modification of  
148 Pt nanospheres on cellulose fibers was confirmed by X-ray photoelectron  
149 spectroscopy (XPS) (Fig. 1SF) and the peaks observed at 73 eV were ascribed to  
150 metallic Pt.

#### 151 Optimization of experiment conditions

152 To achieve the optimal analytical properties of the sensing system, pH and ionic  
153 strength of assay solution on the sensitivity of the sensor were investigated (Fig. 2S).  
154 Fig. 2SA shows the dependence of currents on pH of PBS. An optimal current was  
155 obtained at pH 7.4 PBS. A higher or lower pH resulted in the decrease of catalytic  
156 currents. In addition, as shown in Fig. 2SB, the current value increased with the  
157 increment of ionic strength of assay solution and tended to level off after 10 mM PBS.  
158 Thus, a pH 7.4 PBS (10 mM) was chosen as the supporting electrolyte.

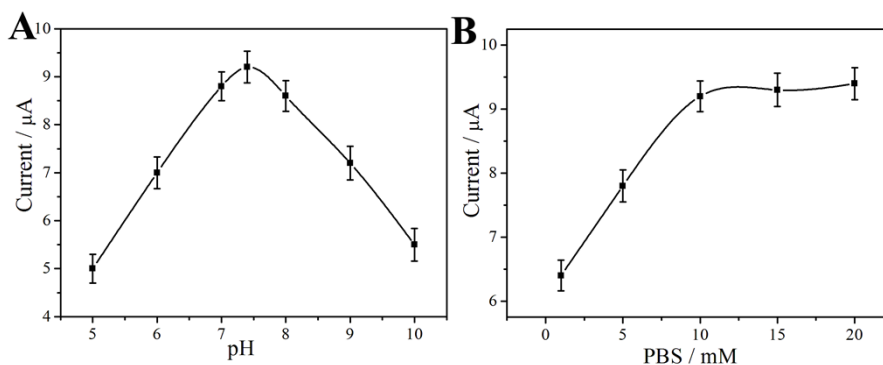

159



160 Fig. 2S Current signal dependence of the Pt-PWE based  $\mu$ -PADs electrochemical  $\text{H}_2\text{O}_2$  sensor on  
161 (A) different pH of PBS from 5.0 to 10.0; (B) different ionic strength of the assay solution in 1mM,  
162 5 mM, 10 mM, 15 mM and 20 mM PBS solution, respectively.

163

#### 164 **The $\text{H}_2\text{O}_2$ standard solution concentration-dependent electrocatalytic current**

165 According to the selectivity of results, 10 mM PBS (pH 7.4) was chosen as the  
166 supporting electrolyte. Then, under the optimal conditions, our constructed cancer  
167 cells immobilized Pt-PWEs were employed to obtain the varied current values  
168 towards various concentrations of  $\text{H}_2\text{O}_2$  (Fig. S3A). The current increased gradually  
169 with an increasing concentration of  $\text{H}_2\text{O}_2$ . When the concentration of  $\text{H}_2\text{O}_2$  exceeded  
170 1.0 mM, the current response became steady (Fig. S3B). The current displays a good  
171 linear increase with  $\text{H}_2\text{O}_2$  in the range 0.10 nM – 1.0 mM, and the calibration equation  
172 between the current ( $I$ ) and the  $\text{H}_2\text{O}_2$  concentration ( $c$ ) is expressed as follows:  $I$   
173 ( $\mu\text{A}$ )= $2.2591+1.3189 \lg c$  (nM),  $R^2= 0.9989$ .

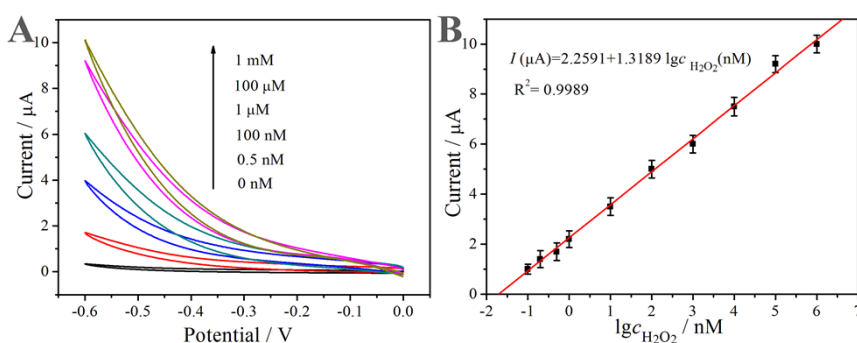

174

175 Fig. S3 The current responses at  $-0.6\text{ V}$  of the cancer cells immobilized Pt-PWE towards various  
176 concentrations of  $\text{H}_2\text{O}_2$  in  $10\text{ mM}$  PBS (pH 7.4) (A); calibration curve for  $\text{H}_2\text{O}_2$  determination (B).

177

178 **The cell concentration-dependent electrocatalytic current**

179 Under the optimal conditions, we also have investigated the influence of the cell  
180 concentration on the electrode to the electrical signal of the releasing H<sub>2</sub>O<sub>2</sub>. And our  
181 modified Pt-PWEs were incubated with various concentrations of SK-BR-3 cells.  
182 Subsequently, cells were stimulated by PMA (100 mg mL<sup>-1</sup>), and the varied current  
183 responses were recorded in Fig. S4. The current increases gradually with an  
184 increasing concentration of SK-BR-3 cells (Fig. S4A) and the current displays a good  
185 linear increase with the logarithm value of cell concentration cells H<sub>2</sub>O<sub>2</sub> in the range  
186 of 1×10<sup>2</sup> to 5×10<sup>6</sup> cells mL<sup>-1</sup> (Fig. S4B). The linear relation is not applicative when  
187 the cell concentration exceed 5×10<sup>6</sup> cells mL<sup>-1</sup>. As cell is a nonconductive  
188 biomacromolecule and may obstruct electron transfer and mass trans-port of the  
189 electrochemical probe. The calibration equation between the current (*I*) and the H<sub>2</sub>O<sub>2</sub>  
190 concentration (*c*) is expressed as follows:  $I$  (μA)= -1.3935+ 1.2795 lg $c_{\text{SK-BR-3}}$  (cells  
191 mL<sup>-1</sup>), R<sup>2</sup>= 0.9987.

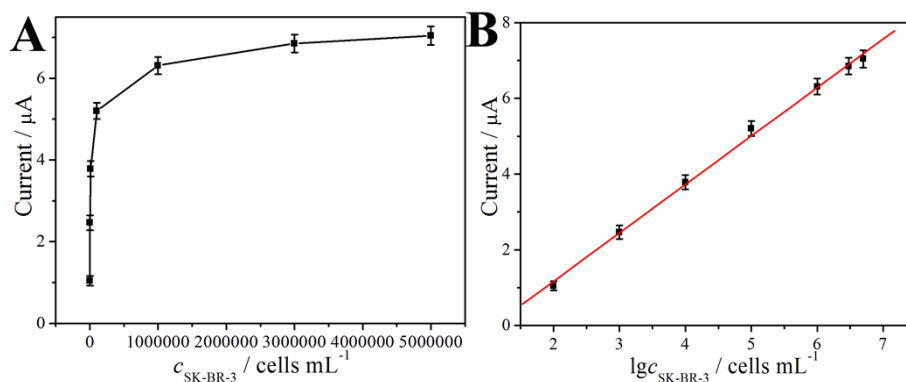

192

193 Fig S4 Relationship between current and SK-BR-3 cells concentration, each point is the average  
194 of five measurements (A); logarithmic calibration curve for SK-BR-3 cells (B).

195

196 **Current analysis of the flux of H<sub>2</sub>O<sub>2</sub> releasing from SK-BR-3 cells**

197 Information on the mechanism of H<sub>2</sub>O<sub>2</sub> release from cells can be inferred from  
198 the time-current response. The H<sub>2</sub>O<sub>2</sub> determination was measured at different time  
199 after the PMA buffer was added to the cancer cells immobilized Pt-PWE. As shown  
200 in Fig. S5A, the current increased with the time varying from t<sub>0</sub> to t<sub>1</sub>, demonstrating  
201 that a short period is needed for cancer cells to be stimulated completely. Then a  
202 stable current reached featuring the end of the event. So our H<sub>2</sub>O<sub>2</sub> determination was  
203 measured after t<sub>1</sub> (8 s), so as to obtain the stable and accurate current value.

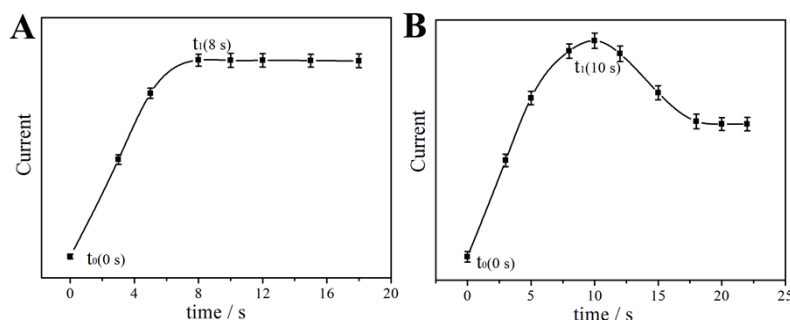

204

205 **Fig. S5** The time-current response of H<sub>2</sub>O<sub>2</sub> released from cancer cells induced by 100 ng mL<sup>-1</sup>  
206 PMA based on our cancer cells immobilized Pt-PWE (A) and Pt nanospheres modified ordinary  
207 glassy carbon electrode (B).

208 As a comparison, Pt nanospheres modified ordinary glassy carbon electrode was  
209 applied for the determination of the flux of H<sub>2</sub>O<sub>2</sub> releasing from SK-BR-3 cells. To  
210 achieve the electrochemical measurements, a conventional three electrode system was  
211 constructed: a modified glassy carbon electrode as the working electrode, Pt and  
212 Ag/AgCl electrode were used as the counter electrode and reference electrode,  
213 respectively. 2.0 mL of PBS solution containing PMA (100 mg mL<sup>-1</sup>) was used as  
214 determination and stimulation buffer and time-current course was recorded in Fig.

215 **S5B**. It can be observed that the trend was similar to that of the curve in **Fig. S5A** with  
 216 the time varying from  $t_0$  to  $t_1$ . The current reduces gradually to a lower value beyond  
 217 the time  $t_1$  (10 s) due to the diffusion process of  $H_2O_2$  released from SK-BR-3 cancer  
 218 cells. The diffusion process of  $H_2O_2$  lower the determination accuracy, and this can be  
 219 largely improved by using our cancer cells immobilized Pt-PWE. It can be explained  
 220 that our Pt nanospheres **grown** paper sample zone maintained good 3D interwoven  
 221 and incompact cellulose fibers networks structure, allowing cells to adhere (highly  
 222 affinitive binding with aptamers) to the cellulose fibers to achieve the in-situ and real-  
 223 time determination of extracellular  $H_2O_2$  (as shown in Scheme 1D). Only 10  $\mu$ L of  
 224 buffer is needed to the Pt-PWE, so  $H_2O_2$  can be electrocatalyzed adequately when  
 225 releasing from cancer cell and rarely diffuse away. Based on the above, our designed  
 226 cancer cell immobilized Pt-PWE demonstrates some advantages in accuracy and  
 227 sensitivity of  $H_2O_2$  determination. **To further confirm the superiority of our  $H_2O_2$**   
 228 **biosensors, analytical performance of some other  $H_2O_2$  biosensors has been collected**  
 229 **in Table S1. As shown in Table S1, our strategy shows shorter response time and**  
 230 **lower detection limit than other  $H_2O_2$  assays as reported previously.**

231

232 **Table S1. Comparison analytical performance of some  $H_2O_2$  biosensors**

| $H_2O_2$ biosensor               | Response time<br>/s | Detection limit<br>/ $\mu$ M | Reference |
|----------------------------------|---------------------|------------------------------|-----------|
| HRP-Au colloid-cysteamine        | 15                  | 0.58                         | [3]       |
| nitrogen-doped graphene          | 20                  | 0.05                         | [4]       |
| HRP-Nafion-silica-sonogel-carbon | 35                  | 1.6                          | [5]       |

|                                  |   |        |           |
|----------------------------------|---|--------|-----------|
| Pt grown paper working electrode | 8 | 0.0001 | This work |
|----------------------------------|---|--------|-----------|

233

234 **References**

235 [1] J. Lu, S. Ge, L. Ge, M. Yan, J. Yu, *Electrochim. Acta.*, 2012, **80**, 334.

236 [2] E. Carrilho, A. W. Martinez and G. M. Whitesides, *Anal. Chem.*, 2009, **81**, 7091.

237 [3] Y. Xiao, H. X. Ju, H. Y. Chen, *Anal. Biochem.*, 2000, **278**, 22.

238 [4] P. W, Z. W. Cai, Y. Gao, H. Zhang, C. X. Cai, *Chem. Commun.*, 2011, **47**, 11327.

239 [5] M. Elkaoutit, I. Naranjo-Rodriguez, M. Domínguez, M. P. Hernández-Artiga, D. Bellido-Milla,

240 J. L. H. H. de Cisneros, *Electrochim. Acta.*, 2008, **53**, 7131.

241
